# Supplementary material
Source: publisher figshare collection journal article supplement (https://frontiersin.figshare.com/ndownloader/files/28559118)
Supplement: Supplementary file [file 28559118]

Supplementary data

| Table S1: List of strains used in this study |                                                                                                                                |                                                                                                                                                                                                                                |
|----------------------------------------------|--------------------------------------------------------------------------------------------------------------------------------|--------------------------------------------------------------------------------------------------------------------------------------------------------------------------------------------------------------------------------|
| Strains                                      | Description                                                                                                                    | Source                                                                                                                                                                                                                         |
| <i>D. dadantii</i>                           |                                                                                                                                |                                                                                                                                                                                                                                |
| 3937 (A4922)                                 | Wild-type strain isolated from <i>Saintpaulia ionantha</i>                                                                     | Kotoujansky A, Lemattre M, Boistard P. Utilization of a thermosensitive episome bearing transposon TN10 to isolate Hfr donor strains of <i>Erwinia carotovora</i> subsp. <i>chrysanthemi</i> . J Bacteriol. 1982;150: 122–131. |
| $\Delta hfq$ (A5292)                         | A4922 hfq::uidA-Kan <sup>R</sup>                                                                                               | C. Blanco                                                                                                                                                                                                                      |
| $\Delta proQ$ (A6175)                        | A4922 proQ::Cm <sup>R</sup>                                                                                                    | This work                                                                                                                                                                                                                      |
| A6170                                        | A4922 + pBBr1-mcs4                                                                                                             | This work                                                                                                                                                                                                                      |
| A6171                                        | A4922 + pBBr1-mcs4::hfq                                                                                                        | This work                                                                                                                                                                                                                      |
| A6172                                        | A4922 + pBBr1-mcs4::proQ                                                                                                       | This work                                                                                                                                                                                                                      |
| A6173                                        | A5292 + pBBr1-mcs4                                                                                                             | This work                                                                                                                                                                                                                      |
| A6174                                        | A5292 + pBBr1-mcs4::hfq                                                                                                        | This work                                                                                                                                                                                                                      |
| A6176                                        | A6175 + pBBr1-mcs4                                                                                                             | This work                                                                                                                                                                                                                      |
| A6177                                        | A6175 + pBBr1-mcs4::proQ                                                                                                       | This work                                                                                                                                                                                                                      |
| A6178                                        | A5292 + pBBr1-mcs4::proQ                                                                                                       | This work                                                                                                                                                                                                                      |
| A6179                                        | A6175 + pBBr1-mcs4::hfq                                                                                                        | This work                                                                                                                                                                                                                      |
| <i>E. coli</i>                               |                                                                                                                                |                                                                                                                                                                                                                                |
| DH5 $\alpha$                                 | F'φ80 dLacZΔ(lacZYA-argF)U169 deoR recA1 endA1 hsdR17 (rk-1, mk+) phoA supE44 λ-thi-1 gyrA96 relA1/F' proAB+lacIqZΔM15 Tn10-Tc | Lab collection                                                                                                                                                                                                                 |
|                                              |                                                                                                                                |                                                                                                                                                                                                                                |
| Phages                                       |                                                                                                                                |                                                                                                                                                                                                                                |
| PhiEC2                                       | General transducing phage of <i>Dickeya dadantii</i>                                                                           | Resibois et al, 1984                                                                                                                                                                                                           |

| Table S2: Plasmids used in this study |                                                                                   |                       |
|---------------------------------------|-----------------------------------------------------------------------------------|-----------------------|
| Plasmids                              | Description                                                                       | Source                |
| pKD3                                  | Cm <sup>R</sup>                                                                   | Lab collection        |
| pGEM-T                                | Cloning vector, Amp <sup>R</sup>                                                  | Promega               |
| pGEM-T- $\Delta$ proQ-BglIII          | pGEM-T with the proQ coding region containing BglIII site                         |                       |
| pGEM-T-proQ::Cm                       | pGEM-T with the proQ coding region containing chloramphenicol resistance cassette | This work             |
| pBBR1-mcs4                            | Amp <sup>R</sup>                                                                  | (Kovach et al., 1995) |
| pBBR1-mcs4::proQ                      | pBBR1-mcs4 containing proQ $\pm$ 500bp                                            | This work             |
| pBBR1-mcs4::hfq                       | pBBR1-mcs4 containing hfq $\pm$ 500bp                                             | This work             |

| Table S3: Primers used for genetic constructions. |                                                         |                                                                                     |
|---------------------------------------------------|---------------------------------------------------------|-------------------------------------------------------------------------------------|
| Primer                                            | Sequence (5'-3')                                        | Description                                                                         |
| P1                                                | GTAGCGCGTTACTGTTTGAGCG                                  | Forward primer located 500bp upstream <i>proQ</i>                                   |
| P2                                                | GTCATCCACGTTTTGCGGCCC                                   | Reverse primer located 500 downstream <i>proQ</i>                                   |
| P3                                                | GGAGATCTGAAATTCCTGATTACAACGG<br>G                       | Diverging with end of <i>proQ</i> ; contains BglII site                             |
| P4+P3'                                            | CCCGTTGTAATCAGGAAATTCAGATCTA<br>CGGAGGCCAACCTGGGCATGAAC | Diverging with start of <i>proQ</i> + reverse complement of P3; contains BglII site |
| P5                                                | GCTAGCGTAGCGCGTTACTGTTTGAGCG                            | Forward primer located 500bp upstream <i>proQ</i> ; contains NheI site              |
| P6                                                | AAGCTTGCTCATCCACGTTTTGCGGCCC                            | Reverse primer located 500 downstream <i>proQ</i> ; contains HindIII site           |
| P7                                                | GCTAGCGTGTTTCATCAGTTTGCGATTGC                           | Forward primer located 500bp upstream <i>hfq</i> ; contains NheI site               |
| P8                                                | AAGCTTCACCAGACGCGTCGCCAGATGG                            | Forward primer located 500bp downstream <i>hfq</i> ; contains HindIII site          |

| Table S4: List of primers used in qPCR |                          |                          |
|----------------------------------------|--------------------------|--------------------------|
| Gene names                             | Forward primers          | Reverse primers          |
| <i>bcsA</i>                            | CCCGATGGACAGTGA AAAAC    | GGCGATAAACAACCCAATGC     |
| <i>celZ</i>                            | TGCCGCTCTCTTATTTGGAT     | CCCCAGCCATTATTACTCCA     |
| <i>fliC</i>                            | CCCAGACCAACCTGAACAAA     | TACCTTCAGCGGTCTGAACC     |
| <i>hfq</i>                             | TAATGGCATCAAGCTGCAAG     | TCAGCGTCATCACTTTCCTG     |
| <i>hrpN</i>                            | TACGATTAAAGCGCACATCG     | GTATTGAGCGACGCACCAAG     |
| <i>kdgK</i>                            | AACACCGCCGTCTACATTTT     | GGCATCGTTACGCCAGTAGT     |
| <i>outC</i>                            | CTGCTGATGCTGCTCTTTTG     | AGAAACGCCGAATAGCGTAA     |
| <i>pelD</i>                            | TTGTGGAAGGTAACGCGCAGTTTG | ATGGCAAATTCACCAACGGCTCTC |
| <i>pelE</i>                            | AGCGAATTCAAAGCAGCACT     | GGCGTTTCGATGTACAGGTT     |
| <i>proQ</i>                            | TCTCCGTCATCCGAAAAATC     | GGAAGCCAGTTGTACCCTGA     |
| <i>prtB</i>                            | AAAGCGGCAAATCTGACCTA     | TTTTGATTGGGGCTGACTTC     |
| <i>prtC</i>                            | ATGACGCTCAACACGCATTA     | AGCTGACCGACTGCAGAAAT     |
| <i>rhlA</i>                            | GCATATTTCCGATCCTGCAC     | CCCAGGAAATCGACAGGATA     |

A.

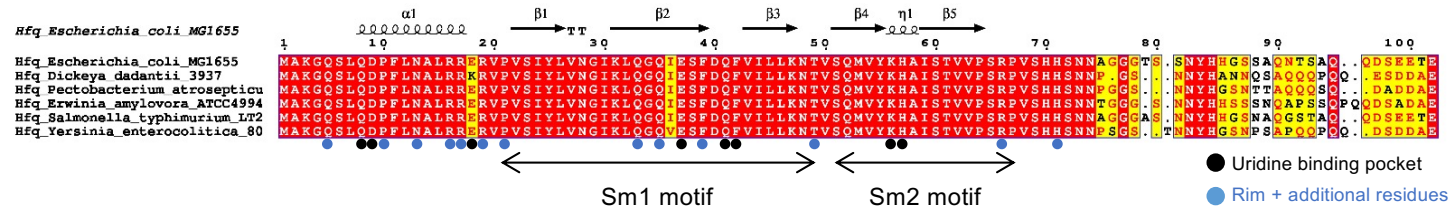

B.

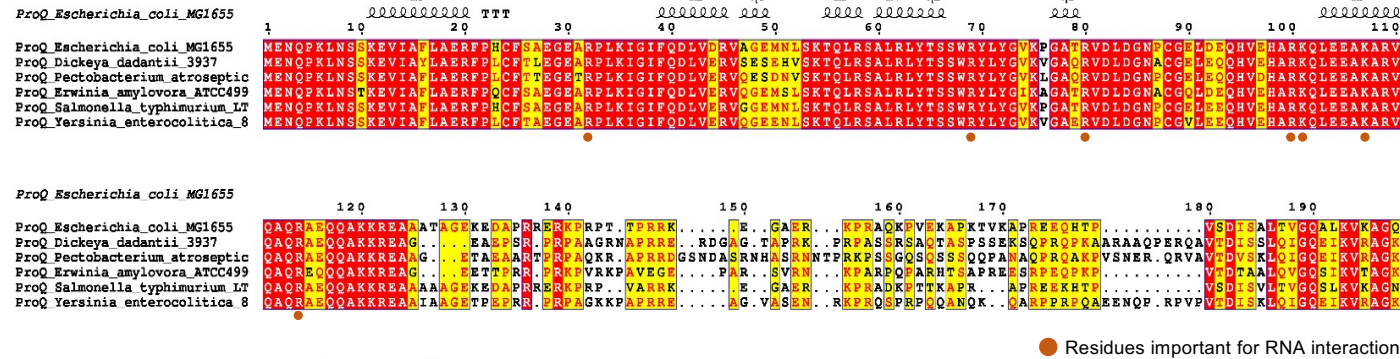

Figure S1: Sequence alignment and secondary structure prediction of Hfq (A) and ProQ (B) protein homologs identified in *Escherichia coli*, *Dickeya dadantii*, *Pectobacterium atrosepticum*, *Erwinia amylovora*, *Salmonella typhimurium* and *Yersinia enterocolitica*.

A.

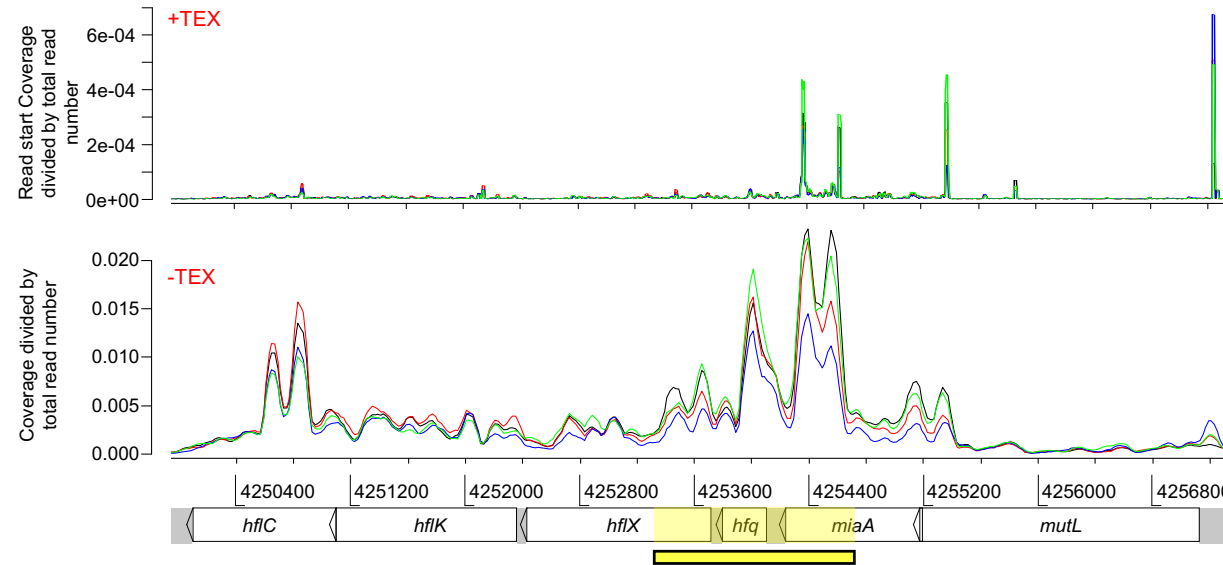

B.

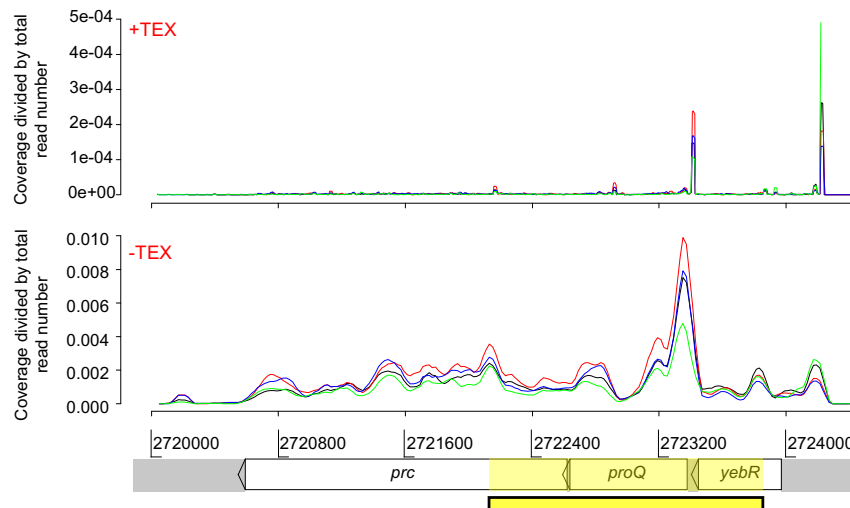

C.

| Line color | Growth phase | Stress |
|------------|--------------|--------|
| Blue       | Stationary   | No     |
| Red        | Exponential  | No     |
| Green      | Stationary   | Yes    |
| Black      | Exponential  | Yes    |

Figure S2: Genomic context and expression profiles of the *hfq* (A) and *proQ* (B) genes in *Dickeya dadantii* 3937. Genomic coordinates are given in the x-axis at the bottom of the figures. The normalized intensities (read coverage for the -TEX library and read start coverage for the +TEX library) are represented in the y-axis. Highlighted regions correspond to fragments used for plasmid complementation. Line colors represent the expression profiles, with sequencing conditions detailed in C.

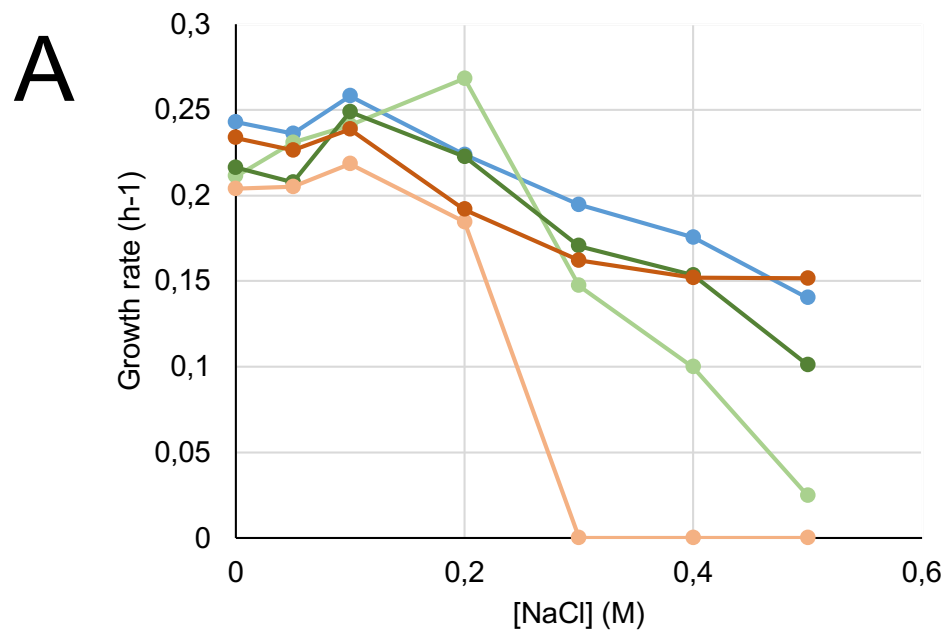

|         |              |              |         |               |               |
|---------|--------------|--------------|---------|---------------|---------------|
|         |              |              |         |               |               |
| Strain  | $\Delta hfq$ | $\Delta hfq$ | WT      | $\Delta proQ$ | $\Delta proQ$ |
| Plasmid | Control      | <i>hfq</i>   | Control | Control       | <i>proQ</i>   |

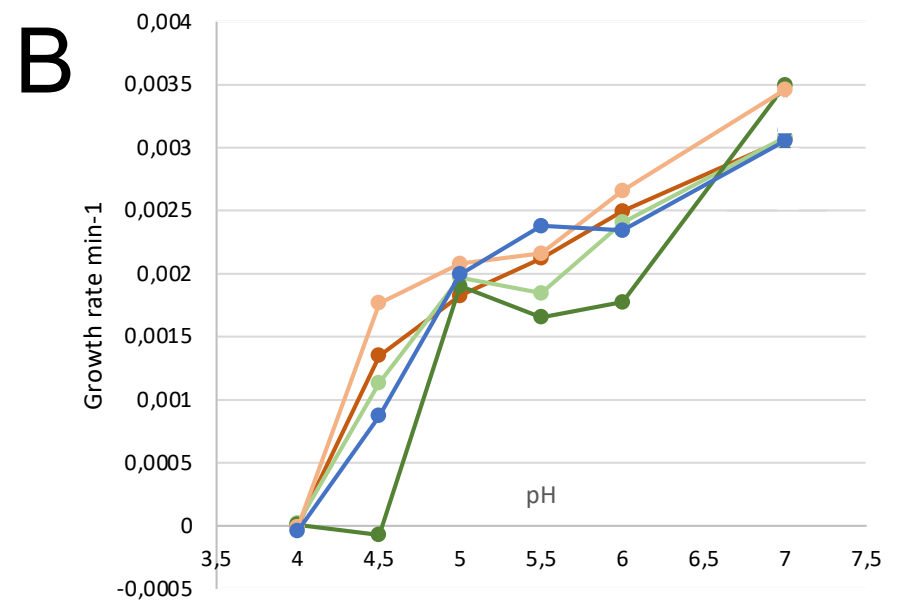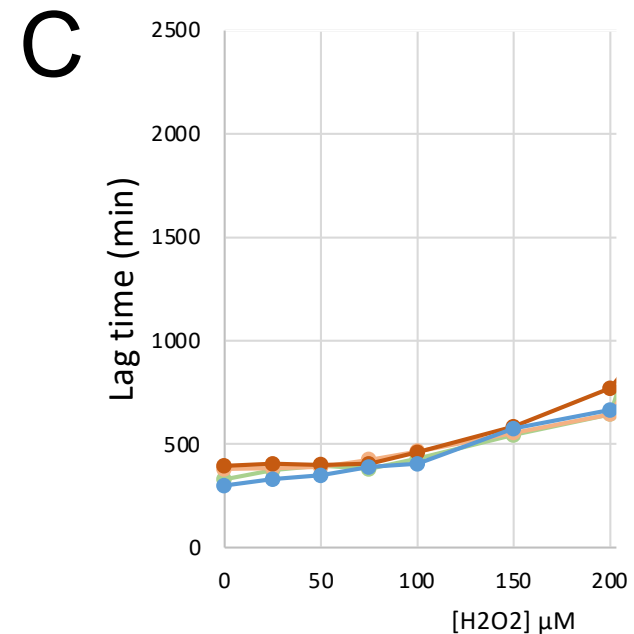

Figure S3: Growth of the wild type, mutant and complemented strains in M63 minimal medium with stress. Overnight bacterial precultures in M63 with sucrose as the carbon source and ampicillin (to maintained plasmid into the cells) were diluted to an OD<sub>600</sub> of 0.03 in a similar medium with CaCl<sub>2</sub> 0.1 mM + polygalacturonic acid (PGA) 0.025 % w/v. A. Osmotic stress was induced by adding different concentrations of NaCl in the medium. OD<sub>600</sub> measurements of the culture were made at regular intervals to determine growth rates. . A. Osmotic stress was induced by adding different concentrations of NaCl in the medium. OD<sub>600</sub> measurements of the culture were made at regular intervals to determine growth rates. B The pH effect on growth rate was analysed using M63 with sucrose buffered with malic acid at different pH ranging from 4.0 to 7.0 (abscissa). C Resistance to oxidative stress was analysed in the same medium by adding H<sub>2</sub>O<sub>2</sub> concentrations ranging from 25 to 200 μM (abscissa). The lag time is represented instead of the growth rate because after the degradation of H<sub>2</sub>O<sub>2</sub> by bacterial catalases, the growth rates are similar.



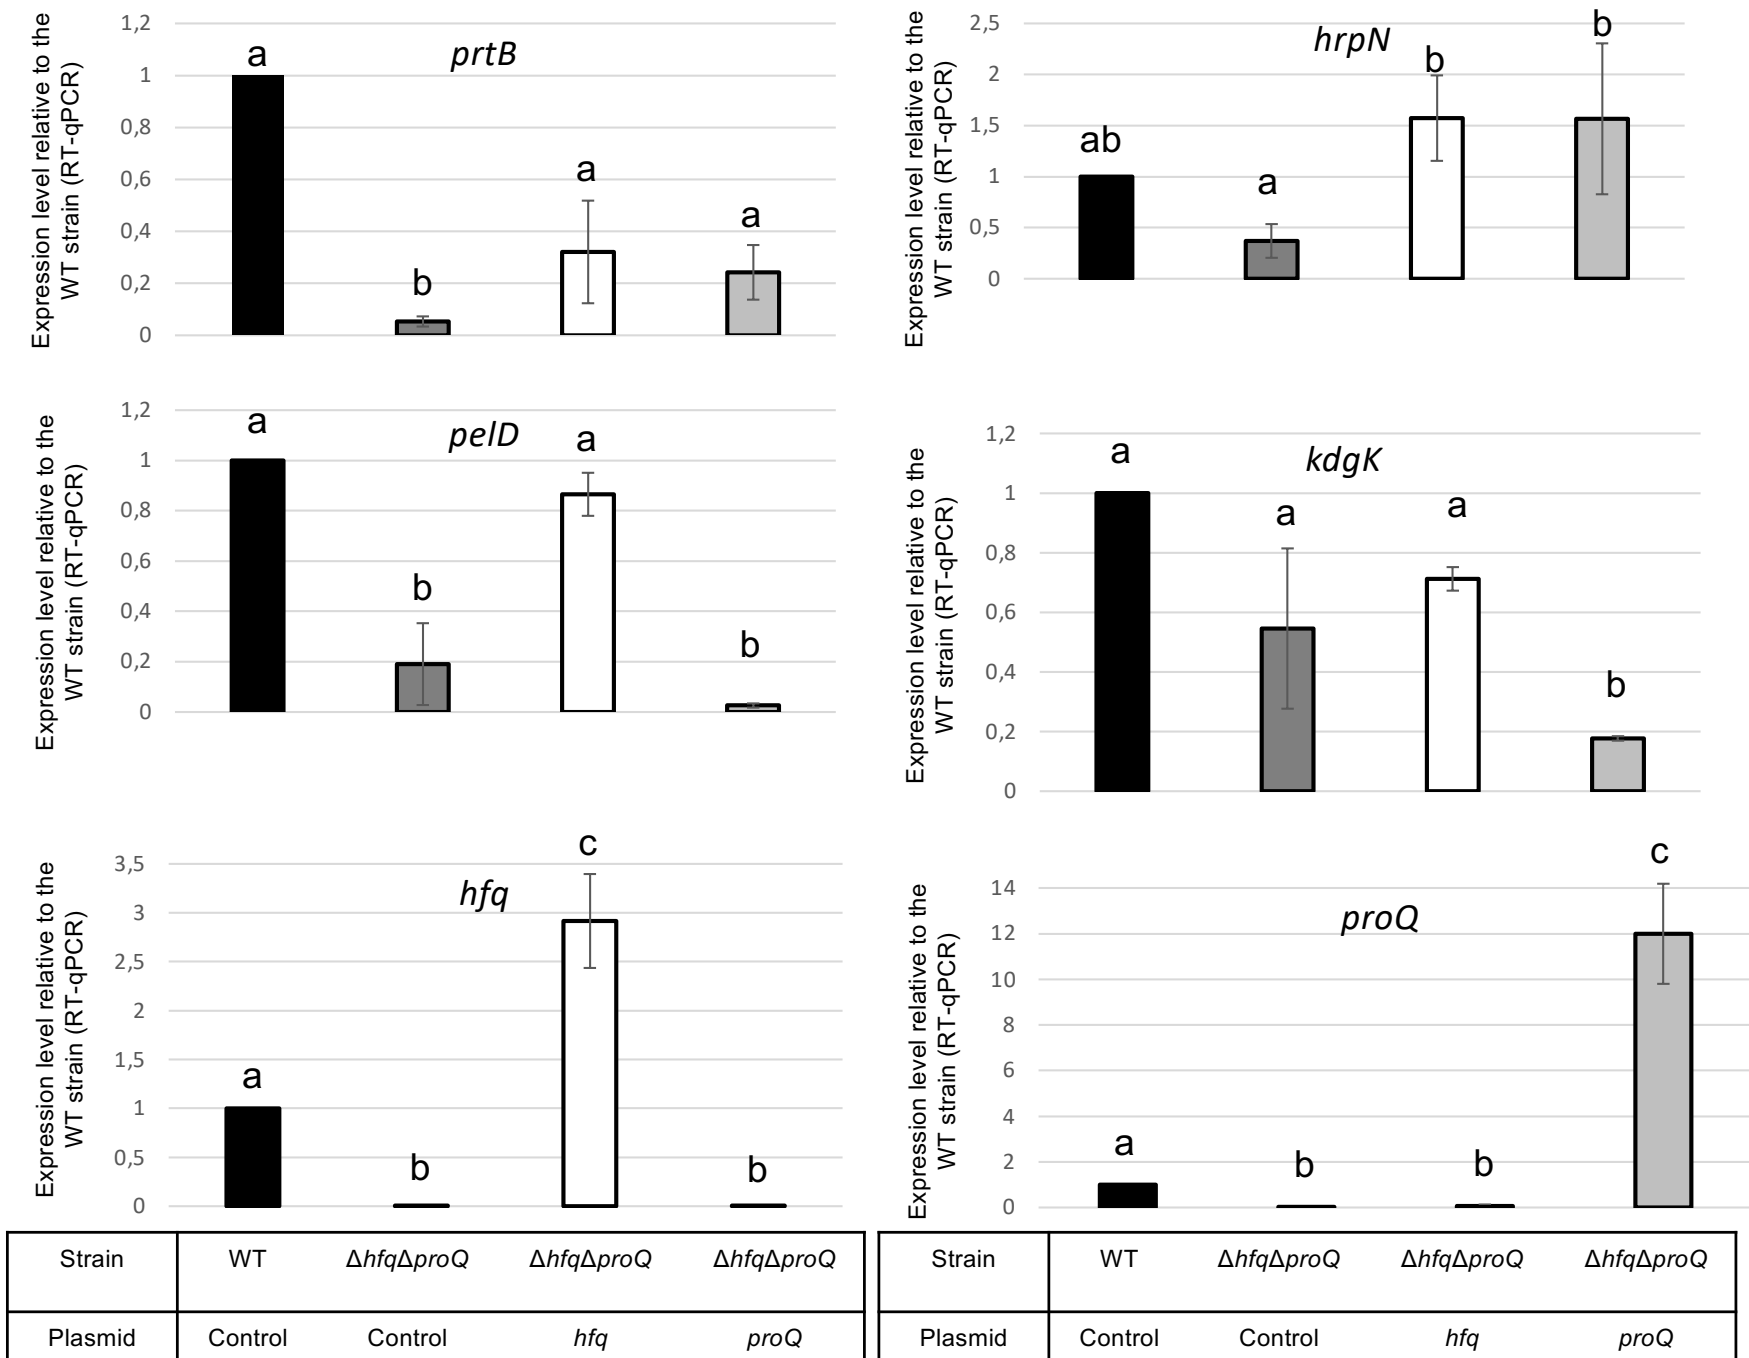

Figure S4: Expression levels in the double mutant strain and the double mutant strain complemented by Hfq or ProQ.

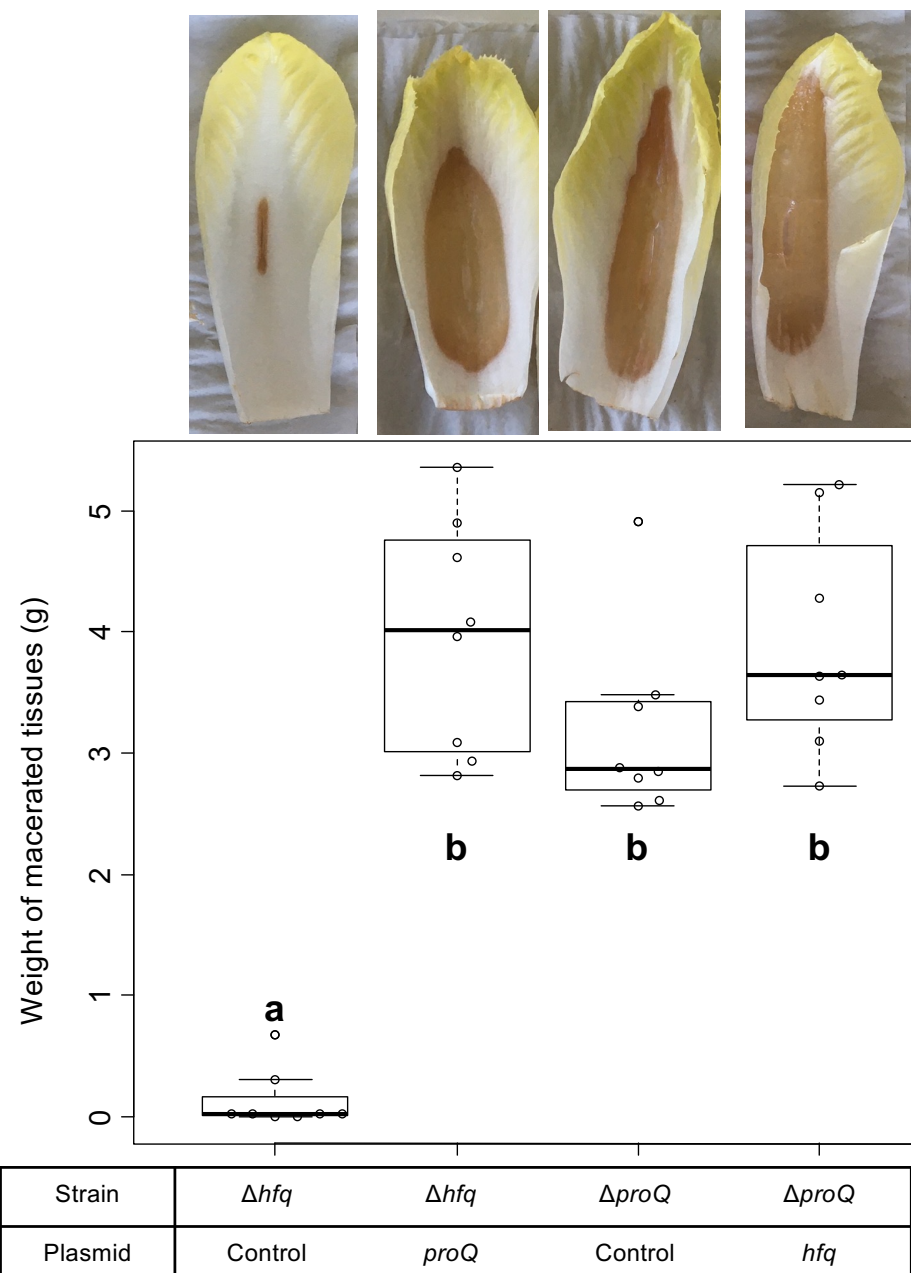

Figure S5: *D. dadantii* virulence assays 48h post infection. Virulence was evaluated on the *proQ* mutant with heterologous expression of *hfq*, and on the *hfq* mutant with heterologous expression of *proQ*. Chicory leaf assays were performed as described in the Materials and methods section with an incubation time of 48h, and weights of macerated tissues were measured. Representative examples of symptoms induced were shown
